# Supplementary material for: Altered Spontaneous Brain Activity in Cirrhotic Patients with Minimal Hepatic Encephalopathy: A Meta-Analysis of Resting-State Functional Imaging
Source: MDPI journal article supplement (doi:10.3390/brainsci13060960), 2023-06-16
Supplement: s1 [file s1]

## Supplementary Materials

|                  |                                                                                                                                                                                                                      |
|------------------|----------------------------------------------------------------------------------------------------------------------------------------------------------------------------------------------------------------------|
| <b>Table S1.</b> | Search strategy in PubMed database                                                                                                                                                                                   |
| <b>Table S2.</b> | Quality assessment checklist.                                                                                                                                                                                        |
| <b>Table S3.</b> | Quality assessment details.                                                                                                                                                                                          |
| <b>Table S4.</b> | Technique details of resting-state functional magnetic resonance imaging studies included in the meta-analysis.                                                                                                      |
| <b>Table S5.</b> | Subgroup meta-analysis results in studies using functional magnetic resonance imaging method (amplitude of low-frequency fluctuations) showing minimal hepatic encephalopathy and healthy controls of brain regions. |
| <b>Table S6.</b> | Subgroup meta-analysis results in studies using functional magnetic resonance imaging methods (regional homogeneity) showing minimal hepatic encephalopathy and healthy controls of brain regions.                   |

**Table S1.** Search strategy in PubMed database

| <b>Search number</b> | <b>Search Details</b>                                                                                                                                                                                                                                                                      |
|----------------------|--------------------------------------------------------------------------------------------------------------------------------------------------------------------------------------------------------------------------------------------------------------------------------------------|
| 1                    | cirrhosis[Title/Abstract] OR cirrhotic[Title/Abstract] OR liver cirrhosis[Title/Abstract] OR hepatic fibrosis[Title/Abstract] OR hepatic encephalopathy[Title/Abstract] OR HE[Title/Abstract] OR minimal hepatic encephalopathy[Title/Abstract] OR MHE[Title/Abstract]                     |
| 2                    | functional magnetic resonance imaging[Title/Abstract] OR functional MRI[Title/Abstract] OR fMRI[Title/Abstract] OR amplitude of low-frequency fluctuation[Title/Abstract] OR ALFF[Title/Abstract] OR fALFF[Title/Abstract] OR regional homogeneity[Title/Abstract] OR ReHo[Title/Abstract] |
| 3                    | 1 AND 2                                                                                                                                                                                                                                                                                    |

**Table S2.** Quality assessment checklist (when criteria were partially met, 0.5 points assigned).

|                                                                                                                                                         |
|---------------------------------------------------------------------------------------------------------------------------------------------------------|
| <b>Category 1: Participants</b>                                                                                                                         |
| <b>Score (0/0.5/1)</b>                                                                                                                                  |
| 1. Patients were evaluated prospectively, specific diagnostic criteria were applied, and demographic data were reported.                                |
| 2. Comparison participants were evaluated prospectively psychiatric and medical illnesses were excluded.                                                |
| 3. Important variables (e.g., age, sex, illness duration, onset, medication status, handedness) were checked either by stratification or statistically. |
| 4. Sample size per group > 10.                                                                                                                          |
| <b>Category 2: Methods for image acquisition and analysis</b>                                                                                           |
| 5. Whole brain analysis was automated with no <i>a priori</i> regional selection.                                                                       |
| 6. Coordinates reported in a standard space.                                                                                                            |
| 7. The imaging technique used was clearly described so that it could be reproduced.                                                                     |
| 8. Measurements were clearly described so that they could be reproduced.                                                                                |
| <b>Category 3: Results and conclusions</b>                                                                                                              |
| 9. Statistical parameters for significant and important non-significant differences were provided.                                                      |
| 10. Conclusions were consistent with the results obtained and the limitations were discussed.                                                           |
| TOTAL /10                                                                                                                                               |

**Table S3.** Quality assessment scores of included studies.

| <b>Studies</b>         | <b>1</b> | <b>2</b> | <b>3</b> | <b>4</b> | <b>5</b> | <b>6</b> | <b>7</b> | <b>8</b> | <b>9</b> | <b>10</b> | <b>Total</b> |
|------------------------|----------|----------|----------|----------|----------|----------|----------|----------|----------|-----------|--------------|
| Chen et al. 2012 [10]  | 1        | 1        | 1        | 1        | 1        | 1        | 1        | 1        | 1        | 1         | 10           |
| Chen et al. 2012 [24]  | 1        | 0.5      | 1        | 1        | 1        | 1        | 1        | 1        | 1        | 1         | 9.5          |
| Ji et al. 2020 [25]    | 1        | 1        | 1        | 1        | 1        | 1        | 1        | 1        | 1        | 1         | 10           |
| Jiang et al. 2017 [26] | 1        | 0.5      | 1        | 1        | 1        | 1        | 1        | 1        | 1        | 0.5       | 9            |
| Ni et al. 2012 [11]    | 1        | 1        | 1        | 1        | 1        | 1        | 1        | 1        | 1        | 1         | 10           |
| Qi et al. 2012 [12]    | 1        | 1        | 1        | 1        | 1        | 1        | 1        | 1        | 1        | 1         | 10           |
| Shi et al. 2015 [27]   | 1        | 1        | 1        | 1        | 1        | 1        | 1        | 1        | 1        | 0.5       | 9.5          |
| Shi et al. 2015 [28]   | 1        | 0.5      | 1        | 1        | 1        | 1        | 1        | 1        | 1        | 0.5       | 9            |
| Sun et al. 2018 [13]   | 1        | 1        | 1        | 1        | 1        | 1        | 1        | 1        | 1        | 1         | 10           |
| Wu et al. 2014 [29]    | 1        | 1        | 1        | 1        | 1        | 1        | 1        | 1        | 1        | 0.5       | 9.5          |
| Yang et al. 2022 [30]  | 1        | 1        | 1        | 1        | 1        | 1        | 1        | 1        | 1        | 1         | 10           |
| Zhong et al. 2016 [14] | 1        | 1        | 1        | 1        | 1        | 1        | 1        | 1        | 1        | 1         | 10           |
| Zhou et al. 2014 [31]  | 1        | 1        | 1        | 1        | 1        | 1        | 1        | 1        | 1        | 0.5       | 9.5          |

**Table S4.** Technique details of resting-state fMRI studies included in the meta-analysis

| Study                  | MR scanner        | Software        | Smoothing kernel (mm) | Statistical threshold                  | Coordinate system | Normalization technique              | Temporal filtering (Hz) | Level of head motion                      |
|------------------------|-------------------|-----------------|-----------------------|----------------------------------------|-------------------|--------------------------------------|-------------------------|-------------------------------------------|
| Chen et al. 2012 [10]  | 1.5 T<br>TOSHIBA  | DPARSF,<br>REST | 4                     | $p < 0.005$ ,<br>AlphaSim<br>corrected | MNI               | spatial<br>normalization<br>into MNI | 0.01–0.08               | 2.0 mm<br>translation<br>or 2.0° rotation |
| Chen et al. 2012 [24]  | 1.5 T<br>TOSHIBA  | REST            | 4                     | $p < 0.01$ , AlphaSim<br>corrected     | MNI               | spatial<br>normalization<br>into EPI | 0.01–0.08               | 2.0 mm<br>translation<br>or 2.0° rotation |
| Ji et al. 2020 [25]    | 3.0 T<br>GE       | DPARSF          | NA                    | $p < 0.05$ , AlphaSim<br>corrected     | MNI               | spatial<br>normalization<br>into MNI | 0.01–0.08               | NA                                        |
| Jiang et al. 2017 [26] | 3.0 T<br>GE       | REST            | 4                     | $p < 0.05$ ,<br>corrected              | MNI               | spatial<br>normalization<br>into MNI | 0.01–0.08               | NA                                        |
| Ni et al. 2012 [11]    | 3.0 T<br>Siemens  | SPM8,<br>REST   | 4                     | $p < 0.01$ ,<br>FDR corrected          | MNI               | spatial<br>normalization<br>into MNI | 0.01–0.08               | 1.0 mm<br>translation<br>or 1.0° rotation |
| Qi et al. 2012 [12]    | 1.5 T<br>GE       | SPM8,<br>REST   | 8                     | $p < 0.05$ , AlphaSim<br>corrected     | MNI               | spatial<br>normalization<br>into MNI | 0.01–0.08               | 1.0 mm<br>translation<br>or 1.0° rotation |
| Shi et al. 2015 [27]   | 3.0 T<br>Phillips | DPARSF          | 4                     | $p < 0.05$ , AlphaSim<br>corrected     | MNI               | spatial<br>normalization<br>into EPI | 0.01–0.08               | 2.0 mm<br>translation<br>or 2.0° rotation |

|                           |                   |                 |    |                                     |     |                                      |           |                                           |
|---------------------------|-------------------|-----------------|----|-------------------------------------|-----|--------------------------------------|-----------|-------------------------------------------|
| Shi et al. 2015 [28]      | 3.0 T<br>Siemens  | DPARSF          | 4  | p < 0.05, AlphaSim<br>corrected     | MNI | spatial<br>normalization<br>into MNI | 0.01–0.08 | 1.5 mm<br>translation<br>or 1.5° rotation |
| Sun et al. 2018 [13]      | 3.0 T<br>GE       | DPABI           | 4  | p < 0.05,<br>FDR corrected          | MNI | spatial<br>normalization<br>into MNI | 0.01–0.08 | 2.0 mm<br>translation<br>or 2.0° rotation |
| Wu et al. 2014 [29]       | 3.0 T<br>Phillips | DPARSF          | 4  | p < 0.005,<br>AlphaSim<br>corrected | MNI | NA                                   | 0.01–0.08 | 1.0 mm<br>translation<br>or 1.0° rotation |
| Yang et al. 2022 [30]     | 3.0 T<br>GE       | SPM8,<br>DPARSF | NA | p < 0.05, AlphaSim<br>corrected     | MNI | spatial<br>normalization<br>into MNI | 0.01–0.08 | 2.0 mm<br>translation<br>or 2.0° rotation |
| Zhong et al. 2016<br>[14] | 3.0 T<br>Phillips | DPARSF,<br>REST | 4  | p < 0.05,<br>AlphaSim<br>corrected  | MNI | spatial<br>normalization<br>into MNI | 0.01–0.08 | 1.0 mm<br>translation<br>or 1.0° rotation |
| Zhou et al. 2014 [31]     | 3.0 T<br>Phillips | DPARSF          | 4  | p < 0.05, AlphaSim<br>corrected     | MNI | NA                                   | 0.01–0.08 | NA                                        |

---

Abbreviations: DPABI, Data Processing and Analysis of Brain Imaging Toolbox; DPARSF, Data Processing Assistant for resting-state Functional Magnetic resonance Imaging; FDR, false discovery rate; fMRI, functional magnetic resonance imaging; MNI, Montreal Neurological Institute; NA, not available; REST, Resting State Functional Magnetic Resonance Imaging Data Analysis Toolkit; SPM, Statistical Parametric Mapping software.

**Table S5.** Subgroup meta-analysis results in studies using fMRI method (ALFF) showing MHE vs HCs of brain regions.

| Brain region                                | MNI<br>coordinates<br>X    Y    Z | SDM<br>Z<br>score | P           | No. of<br>voxels | Cluster breakdown (no. of voxels)                                                                                                                         |
|---------------------------------------------|-----------------------------------|-------------------|-------------|------------------|-----------------------------------------------------------------------------------------------------------------------------------------------------------|
| <i>MHE patients &gt; HCs</i>                |                                   |                   |             |                  |                                                                                                                                                           |
| None                                        |                                   |                   |             |                  |                                                                                                                                                           |
| <i>MHE patients &lt; HCs</i>                |                                   |                   |             |                  |                                                                                                                                                           |
| Left superior frontal gyrus                 | 2,34,44                           | -4.791            | 0.000999987 | 697              | Left superior frontal gyrus, medial, BA 8, BA 9, BA 24, BA 32 (408)                                                                                       |
| Right median cingulate / paracingulate gyri | 2,-42,36                          | -4.289            | 0.000999987 | 809              | Left median cingulate / paracingulate gyri, BA 23 (206)<br>Right median cingulate / paracingulate gyri, BA 23 (217)<br>Right precuneus, BA 5, BA 23 (146) |

Abbreviations: ALFF, amplitude of low-frequency fluctuations; BA, Brodmann area; fMRI, functional magnetic resonance imaging; HCs, Healthy controls; MHE, minimal hepatic encephalopathy; MMNI, Montreal Neurological Institute; SDM, signed differential mapping; SDM-Z, Seed-based d Mapping Z score.

Cluster extent threshold: 10 voxels.

**Table S6.** Subgroup meta-analysis results in studies using fMRI method (ReHo) showing MHE vs HCs of brain regions.

| Brain region                               | MNI coordinate<br>s |   |   | SDM<br>Z score | P           | No. of<br>voxels | Cluster breakdown (no. of voxels)                                                                                                                                                                                |
|--------------------------------------------|---------------------|---|---|----------------|-------------|------------------|------------------------------------------------------------------------------------------------------------------------------------------------------------------------------------------------------------------|
|                                            | X                   | Y | Z |                |             |                  |                                                                                                                                                                                                                  |
| <i>MHE patients &gt; HCs</i>               |                     |   |   |                |             |                  |                                                                                                                                                                                                                  |
| None                                       |                     |   |   |                |             |                  |                                                                                                                                                                                                                  |
| <i>MHE patients &lt; HCs</i>               |                     |   |   |                |             |                  |                                                                                                                                                                                                                  |
| Left median cingulate / paracingulate gyri | -2,26,32            |   |   | -5.256         | 0.000999987 | 868              | Left superior frontal gyrus, medial, BA 8, BA 9, BA 24, BA 32 (176)<br><br>Left median cingulate / paracingulate gyri, BA 24, BA 32 (145)<br><br>Right median cingulate / paracingulate gyri, BA 24, BA 32 (207) |

Abbreviations: BA, Brodmann area; fMRI, functional magnetic resonance imaging; HCs, Healthy controls; MHE, minimal hepatic encephalopathy; MMNI, Montreal Neurological Institute; ReHo, regional homogeneity; SDM, signed differential mapping; SDM-Z, Seed-based d Mapping Z score.

Cluster extent threshold: 10 voxels.
